# Supplementary material
Source: MDPI journal article supplement (https://www.mdpi.com/2076-3417/11/18/8685)
Supplement: s1 [file s1]

## Supplementary Materials file

**Table S1.** The linear gradient used in the present study

| Time (minutes) | Solution A | Solution B |
|----------------|------------|------------|
| 0              | 90         | 10         |
| 20             | 70         | 30         |
| 25             | 60         | 40         |
| 65             | 90         | 10         |
| 70             | 90         | 10         |

**Table S2.** Validation data for HPLC method used to determine the ascorbic acid

| Accuracy    | Precision                                     |                                       |                                       |     | Recovery    | Linearity   |        |          | Range       |
|-------------|-----------------------------------------------|---------------------------------------|---------------------------------------|-----|-------------|-------------|--------|----------|-------------|
| 98.75±1.20% | Repeatability                                 | Reproducibility                       |                                       |     | 98.05±1.25% | Slope       | r      | FR       | 20-80 µg/mL |
|             | S= 2.0298<br><br>Sx= 0.6418<br><br>RSD= 0.65% | I                                     | II                                    | III |             | 17510464.99 | 0.9997 | 19401821 |             |
|             | S= 3.3726<br>Sx= 1.0665<br>RSD= 1.8%          | S= 2.9666<br>Sx= 0.9381<br>RSD= 0.95% | S= 3.7473<br>Sx= 1.1850<br>RSD= 1.20% |     |             |             |        |          |             |

**Table S3.** Equivalent antioxidant capacity (TEAC) values for hydroalcoholic solutions of *Medicaginis herba*, *Trifolii pratense flores*, *Ginkgo bilobae folium*, *Myrtilli fructus*, *Cynosbati fructus* and CILTAG. Spectrometric determination.

| Sample                          | Time (minutes) | Antioxidant capacity |
|---------------------------------|----------------|----------------------|
| <i>Medicaginis herba</i>        | 0              | 0.698                |
|                                 | 2              | 0.900                |
| <i>Trifolii pratense flores</i> | 0              | 0.503                |
|                                 | 2              | 0.693                |
| <i>Ginkgo bilobae folium</i>    | 0              | 0.328                |
|                                 | 2              | 0.269                |
| <i>Myrtillis fructus</i>        | 0              | 1.360                |
|                                 | 2              | 1.310                |
| <i>Cynosbati fructus</i>        | 0              | 0.356                |
|                                 | 2              | 0.401                |
| CILTAG                          | 0              | 1.350                |
|                                 | 2              | 1.260                |

**Table S4.** Antioxidant capacity (AC) values for hydro-alcoholic solutions of *Medicaginis herba*, *Trifolii pratensae flores*, *Ginkgo bilobae folium*. Spectrometric determination

| Sample                           | Time (min) | Antioxidant capacity (AC) |
|----------------------------------|------------|---------------------------|
| <i>Medicaginis herba</i>         | 0          | 0.192                     |
|                                  | 2          | 0.2                       |
| <i>Trifolii pratensae flores</i> | 0          | 0.510                     |
|                                  | 2          | 0.451                     |
| <i>Ginkgo bilobae folium</i>     | 0          | 1.56                      |
|                                  | 2          | 1.40                      |

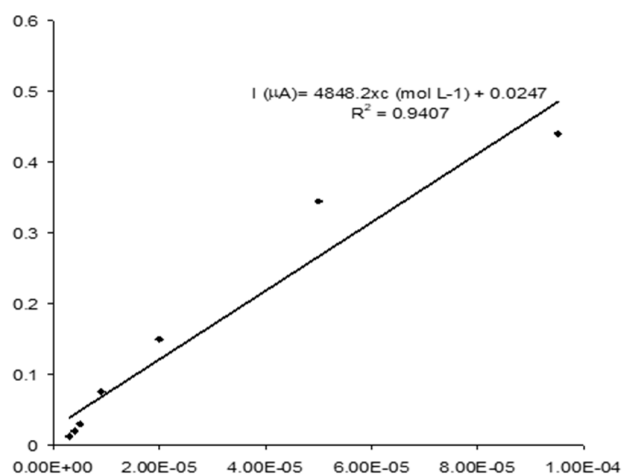

**Figure S1.** Calibration line for Trolox

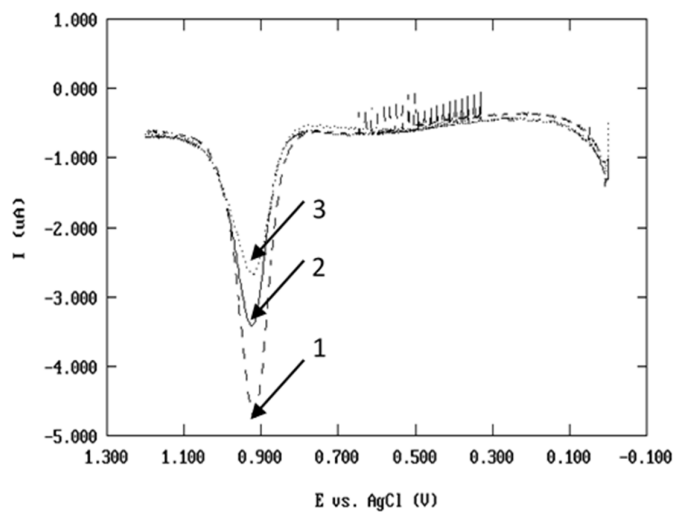

**Figure S2.** Overlapping voltammograms for DPPH, methanolic solutions:  $10^{-4} \text{ mol L}^{-1}$  (1),  $5 \times 10^{-5} \text{ mol L}^{-1}$  (2),  $2.55 \times 10^{-5} \text{ mol L}^{-1}$  (3)

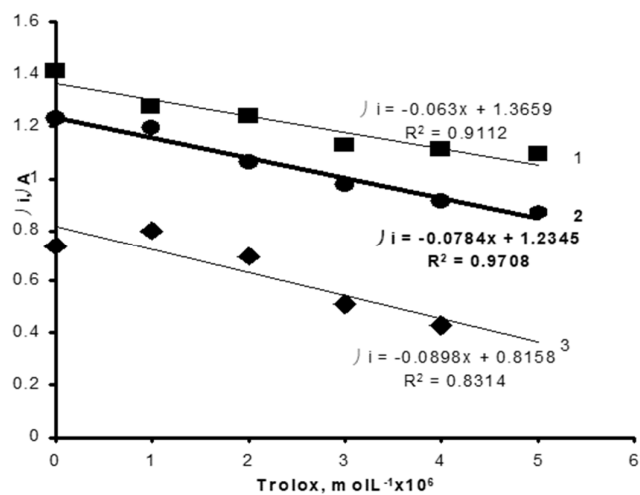

**Figure S3.** Variation in the intensity of DPPH anodic peak current with the Trolox concentration, at the time 0 (1), at 2 minutes (2) and at 4 minutes (3)

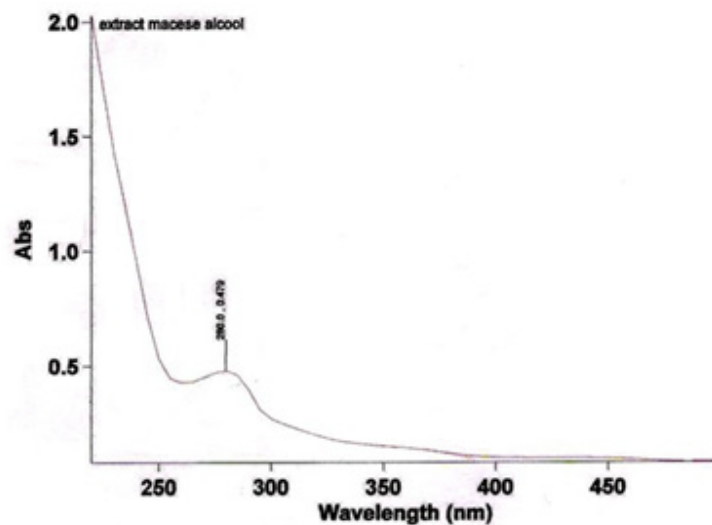

**Figure S4.** UV-Vis spectrum of hydroalcoholic *Cynosbati fructus* extractive solution

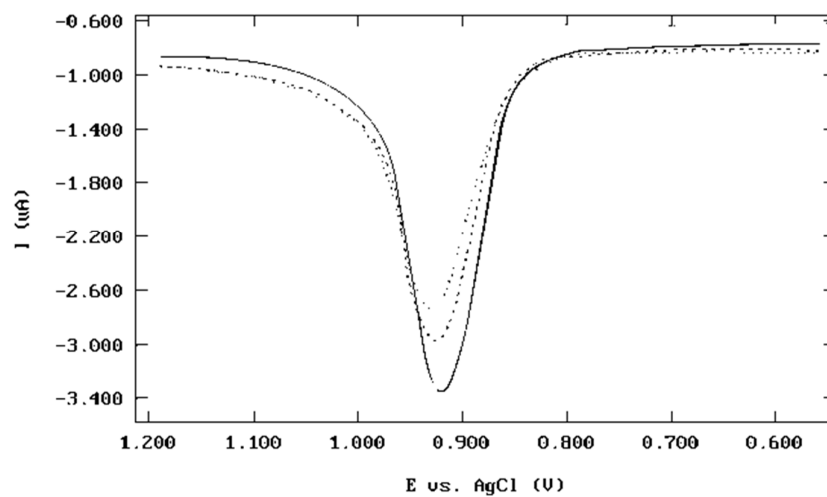

**Figure S5.** Overlapping voltammograms corresponding to DPPH, addition of 10  $\mu L$  of the hydroalcoholic solution of *Medicaginis herba* at time 0, respectively at 2 minutes

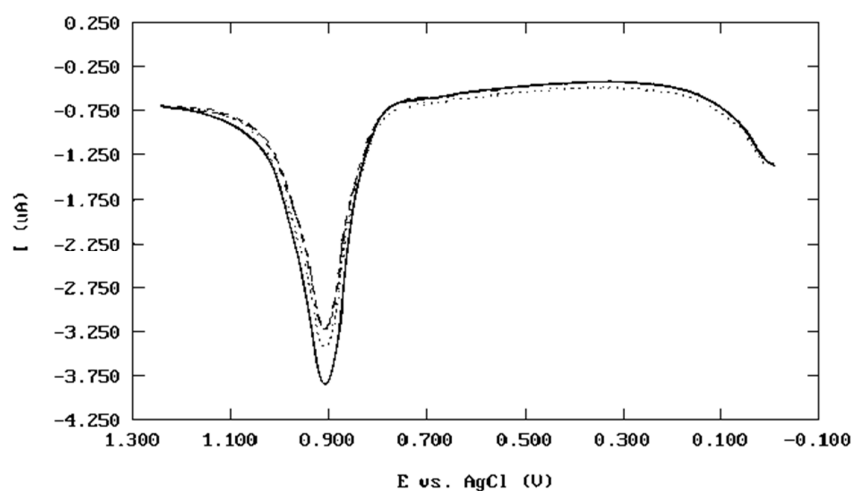

**Figure S6.** Overlapping voltammograms corresponding to DPPH, addition of 10  $\mu L$  of the hydroalcoholic solution of *Trifolii pratensae flores* at time 0, respectively at 2 minutes

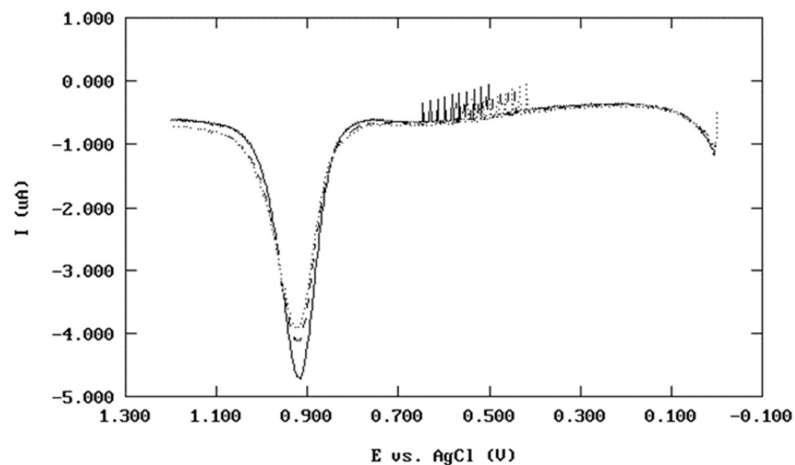

**Figure S7.** Overlapping voltammograms corresponding to DPPH, addition of 10  $\mu\text{L}$  of the hydroalcoholic solution of *Ginkgo biloba* folium at time 0, respectively

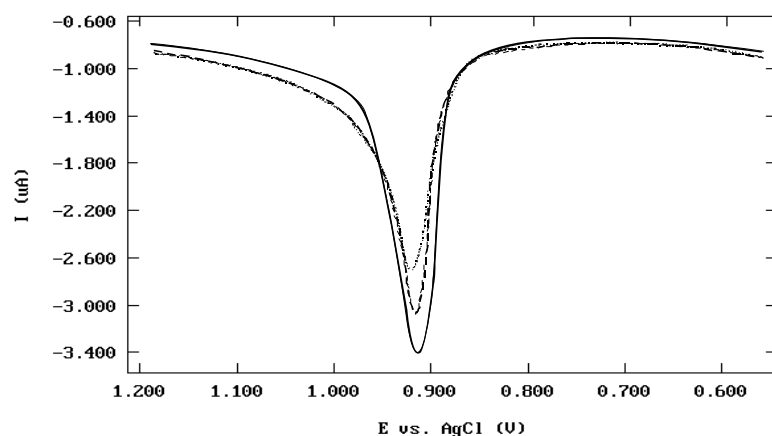

**Figure S8.** Overlapping voltammograms corresponding to DPPH, addition of 10  $\mu\text{L}$  of the hydroalcoholic solution of *Myrtilli fructus* at time 0, respectively at 2 minutes

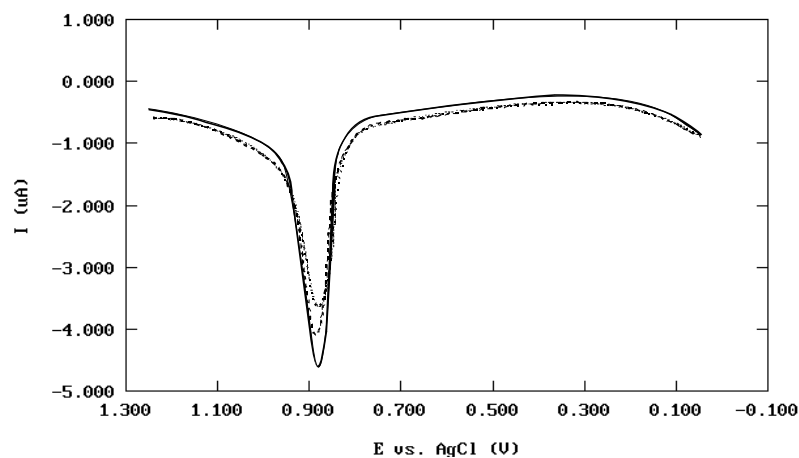

**Figure S9.** Overlapping voltammograms corresponding to DPPH, addition of 10  $\mu\text{L}$  of the hydroalcoholic solution of *Cynosbati fructus* at time 0, respectively at 2 minutes

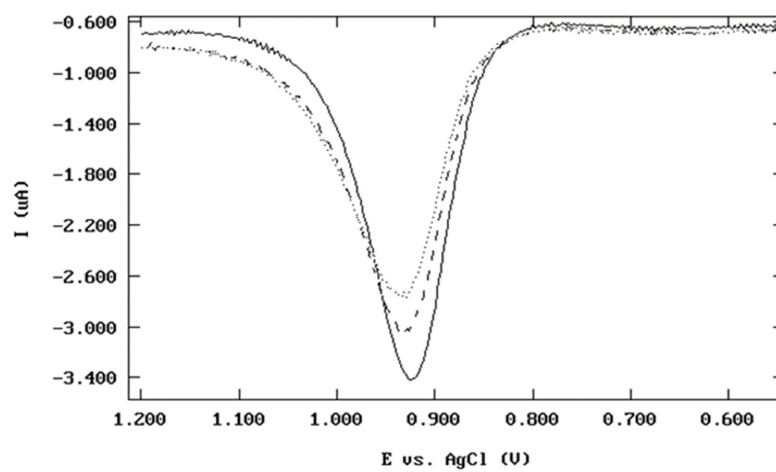

**Figure S10.** Overlapping voltammograms corresponding to DPPH, addition of 10  $\mu\text{L}$  of the hydroalcoholic solution of *CILTAG product* at time 0, respectively at 2 minutes
